# Supplementary material for: Discoloration of Historical Plastic Objects: New Insight into the Degradation of β-Naphthol Pigment Lakes
Source: MDPI journal article supplement (doi:10.3390/polym13142278), 2021-07-12
Supplement: s1 [file s1]

## Supporting Information

# Discoloration of Historical Plastic Objects: New Insight into the Degradation of $\beta$ -Naphthol Pigment Lakes

Anna Micheluz <sup>1</sup>, Eva Mariasole Angelin <sup>2,\*</sup>, João Almeida Lopes <sup>3</sup>, Maria João Melo <sup>2</sup> and Marisa Pamplona <sup>1,\*</sup>

<sup>1</sup> Conservation Science Department, Deutsches Museum, Museumsinsel 1, 80538 Munich, Germany; a.micheluz@deutsches-museum.de (A.M.)

<sup>2</sup> Department of Conservation and Restoration and LAQV-REQUIMTE, NOVA School of Science and Technology, NOVA University Lisbon, 2829-516 Caparica, Portugal; mjm@fct.unl.pt (M.J.M)

<sup>3</sup> iMed.Ulisboa-Research Institute for Medicines, Faculty of Pharmacy, University of Lisbon, Av. Prof. Gama Pinto, 1649-003 Lisbon, Portugal; jlopes@ff.ulisboa.pt (J.A.L.)

\* Correspondence: e.angelin@campus.fct.unl.pt (E.M.A.); m.pamplona@deutsches-museum.de (M.P.)

## Contents

|                            |    |
|----------------------------|----|
| Colorimetric measures..... | 2  |
| Figures.....               | 2  |
| Tables.....                | 11 |
| References.....            | 14 |

## Colorimetric measures

During color measurement significant differences with the 0h are indicated for both PE reference samples and historical lids. In detail, stepwise increase in the positive  $b^*$  values of HDPE and LDPE samples was observed indicative of yellowing (**Figure S2a,b**). The historical lids share the same tendency with their positive  $a^*$  and  $b^*$  coordinates decreasing towards more achromatic values as  $L^*$  increases (**Figure S2c,d**). This trend is easily explained because the red pigments of the historical samples faded.  $L^*a^*b^*$  coordinates and total color variation between 0h and 770h of irradiation are reported in **Table S3**. The most dramatic color change was observed for lid 1 and 2 ( $\Delta E^*_{ab} > 45$ ). Lid 2 was partially discolored before irradiation, and its color faded completely with the photoaging (**Figure S3**). Interestingly, it presents fading until 220h while after the only polymer contributes to color change with yellowing symptoms (**Figure S2d**).

## Figures

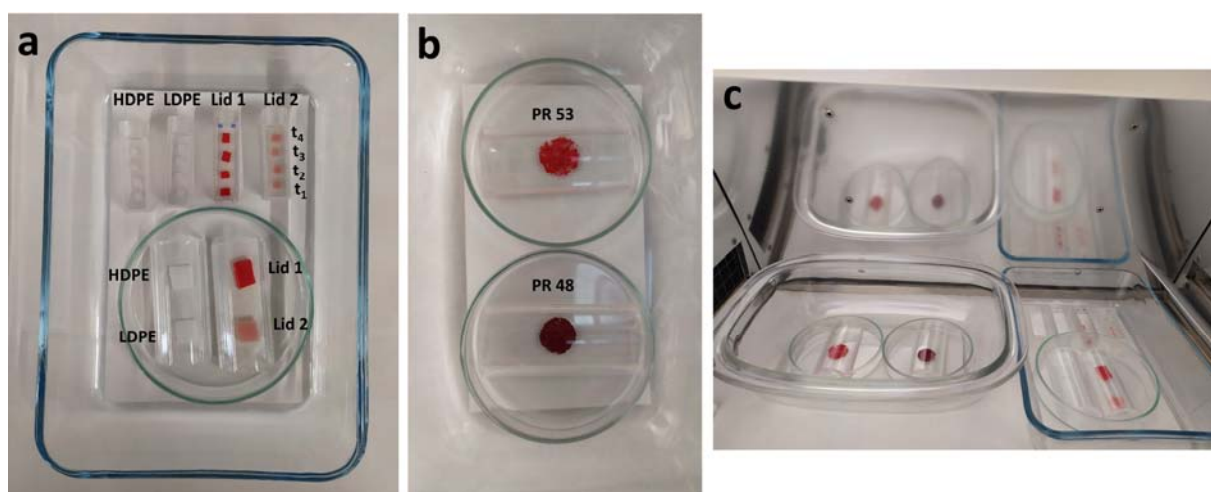

**Figure S1.** Arrangement of samples during the aging experiment. a) historical and polymer reference samples, b) pigment powders, c) all samples inside of the chamber.

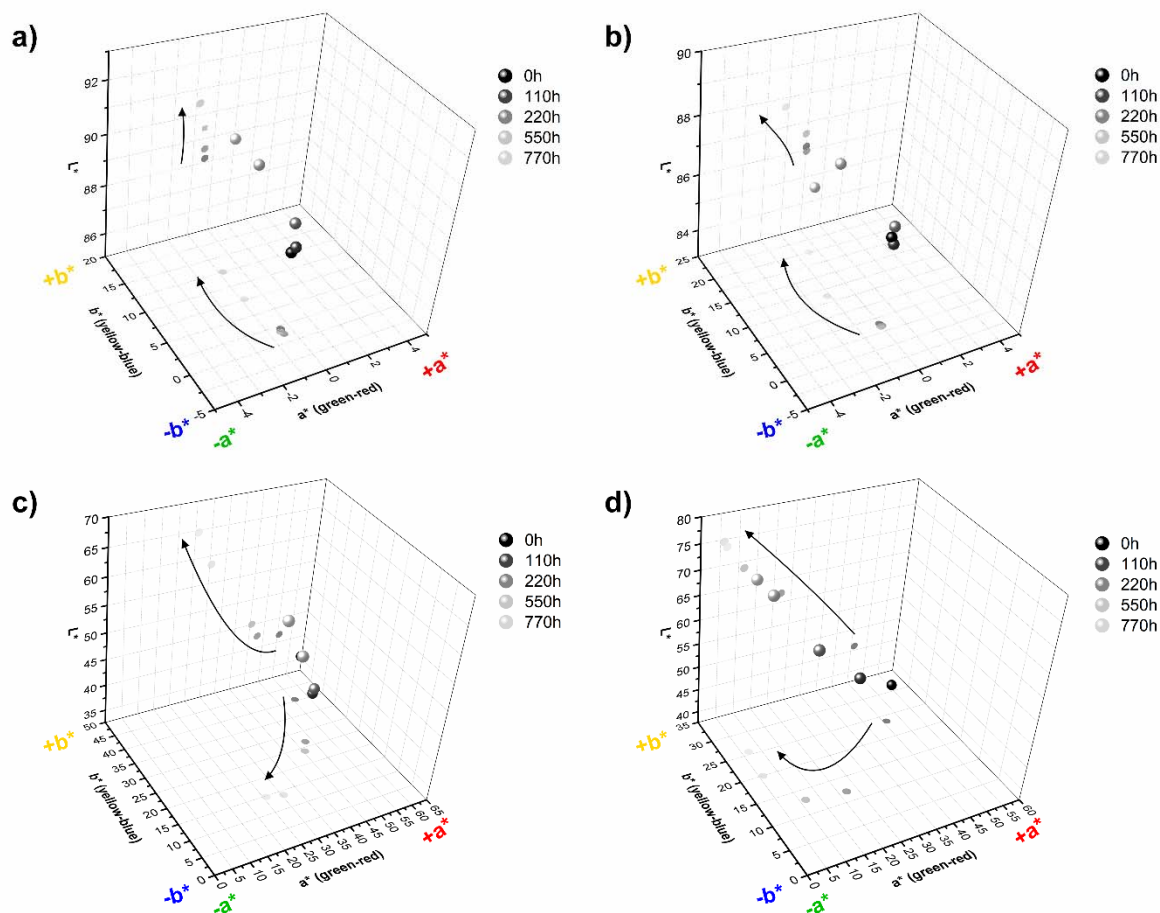

**Figure S2.**  $L^*$ ,  $a^*$ ,  $b^*$  values in 3-dimensional CIELab76 Color Space during aging: (a) HDPE, (b) LDPE, (c) lid 1, (d) lid 2. Projections of the points along the  $L^*$  vertical axis and  $a^*$  and  $b^*$  perpendicular horizontal axes are also reported. The arrows define the color change over time.

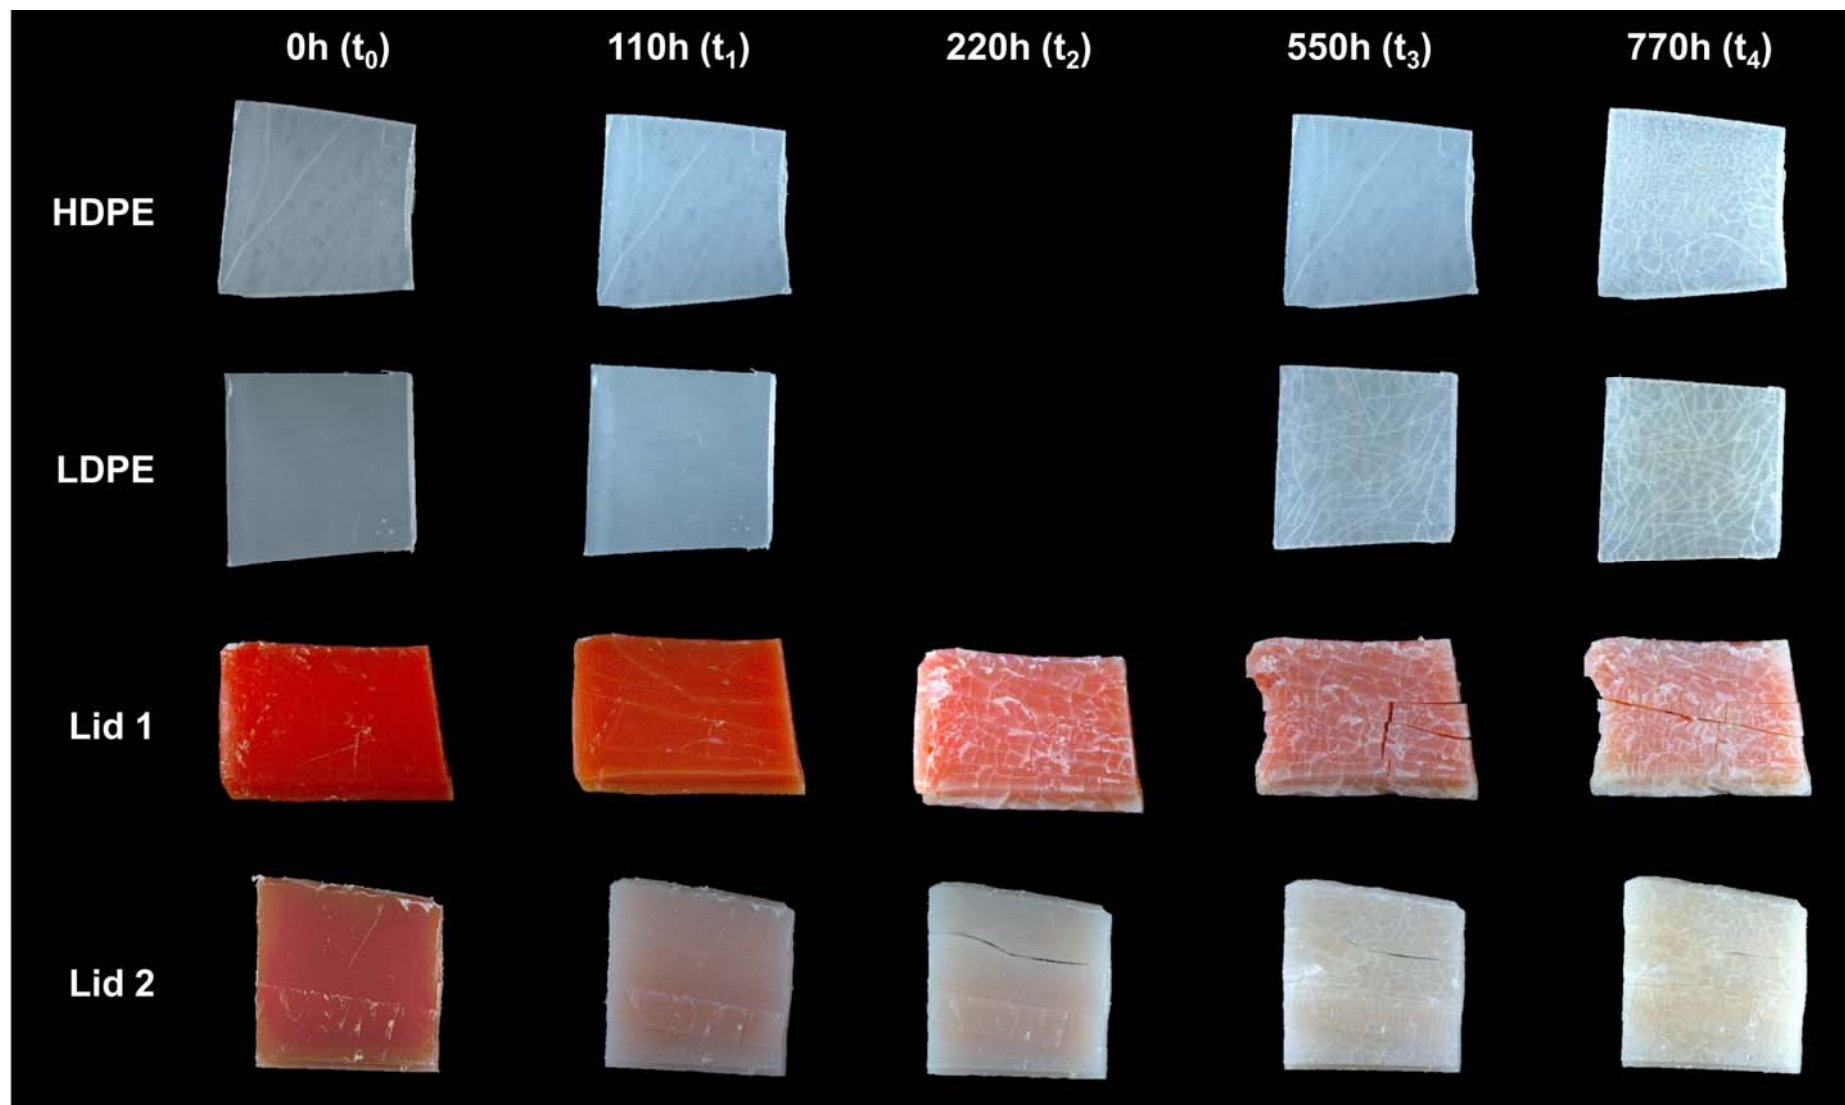

**Figure S3.** Stereomicroscope images of the plastic samples during the aging (25x). The pictures show the exposed areas.

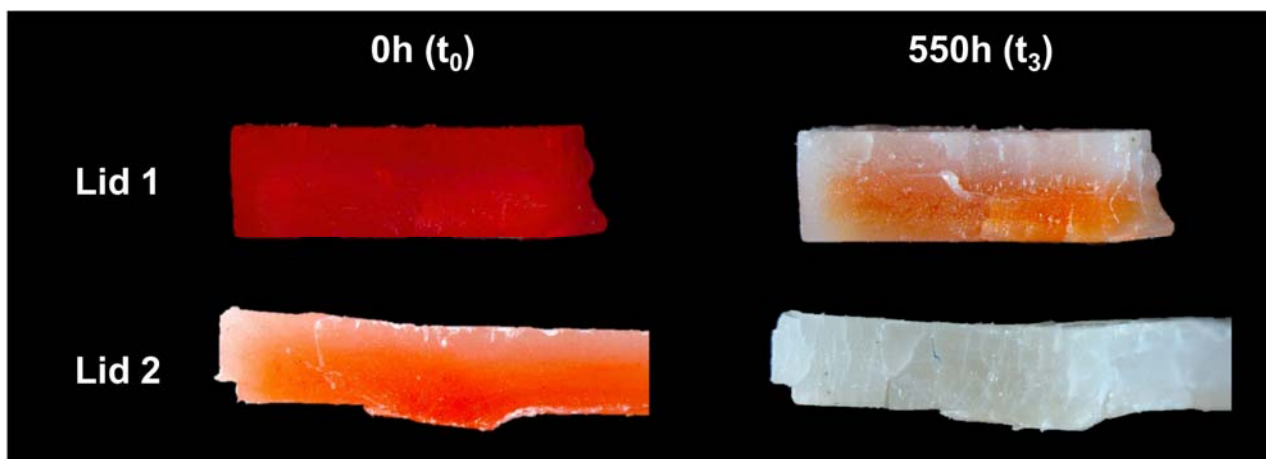

**Figure S4.** Stereomicroscope images taken from the side of the lids 1 and 2 at 0h and 550h (ca.1 mm thickness). The exposed areas correspond to the upper part of the sample.

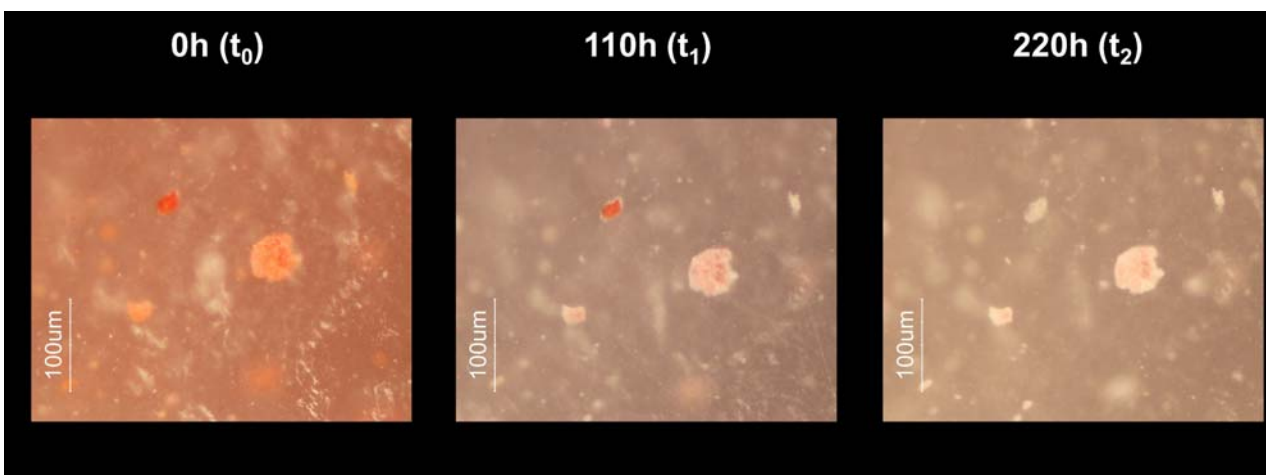

**Figure S5.** Microscopy images of the red particles/aggregates dispersed in the polymeric matrix under reflected visible light (dark field) of lid 2 sample. Images were collected directly from the sample in situ.

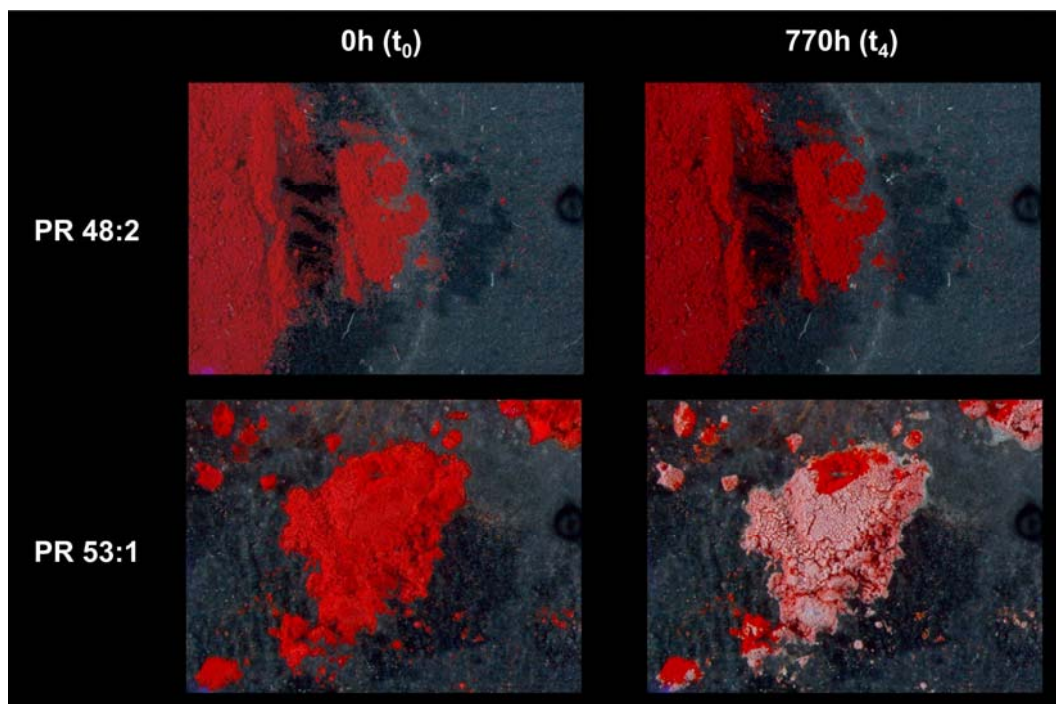

**Figure S6.** Stereomicroscope images of the pigment powders at 0h and 770h.

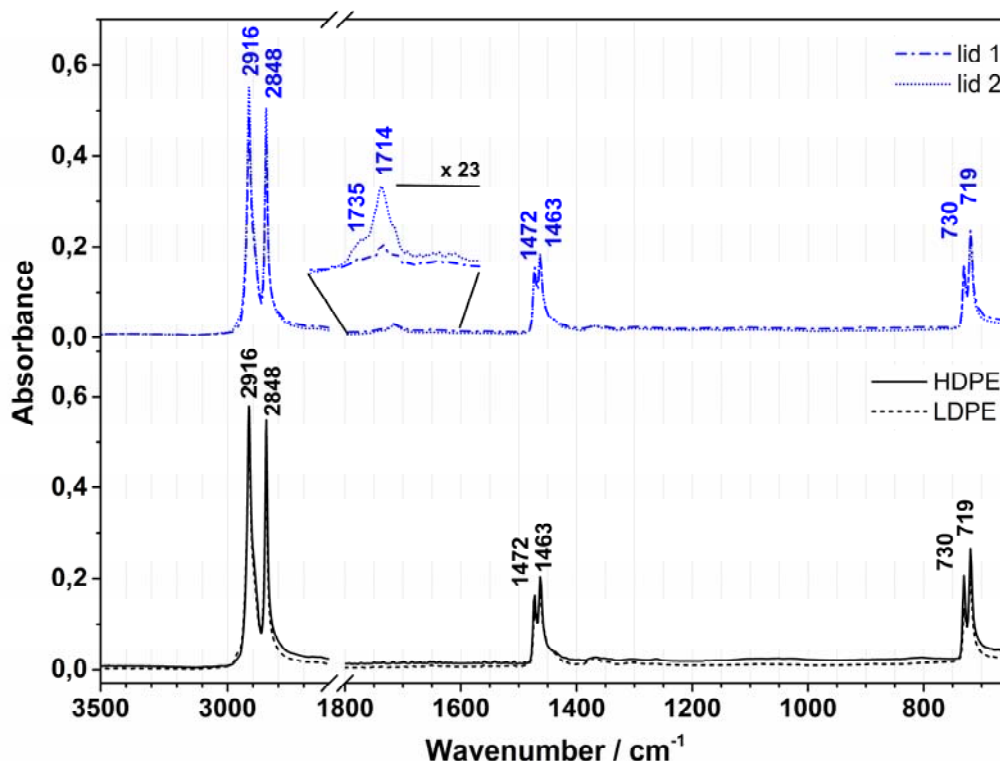

**Figure S7.** ATR-FTIR spectra of lid 1 and lid 2 samples (top, blue lines). Vibrational spectra of the polymer references HDPE and LDPE are reported for comparison (bottom, black lines).



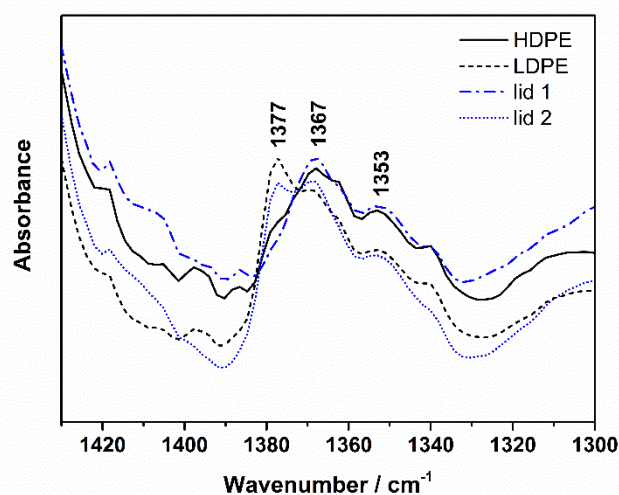

**Figure S8.** ATR-FTIR spectra of HDPE, LDPE, lid 1 and lid 2 samples at  $t_0$  (detail of the interval 1300–1430  $\text{cm}^{-1}$ ).

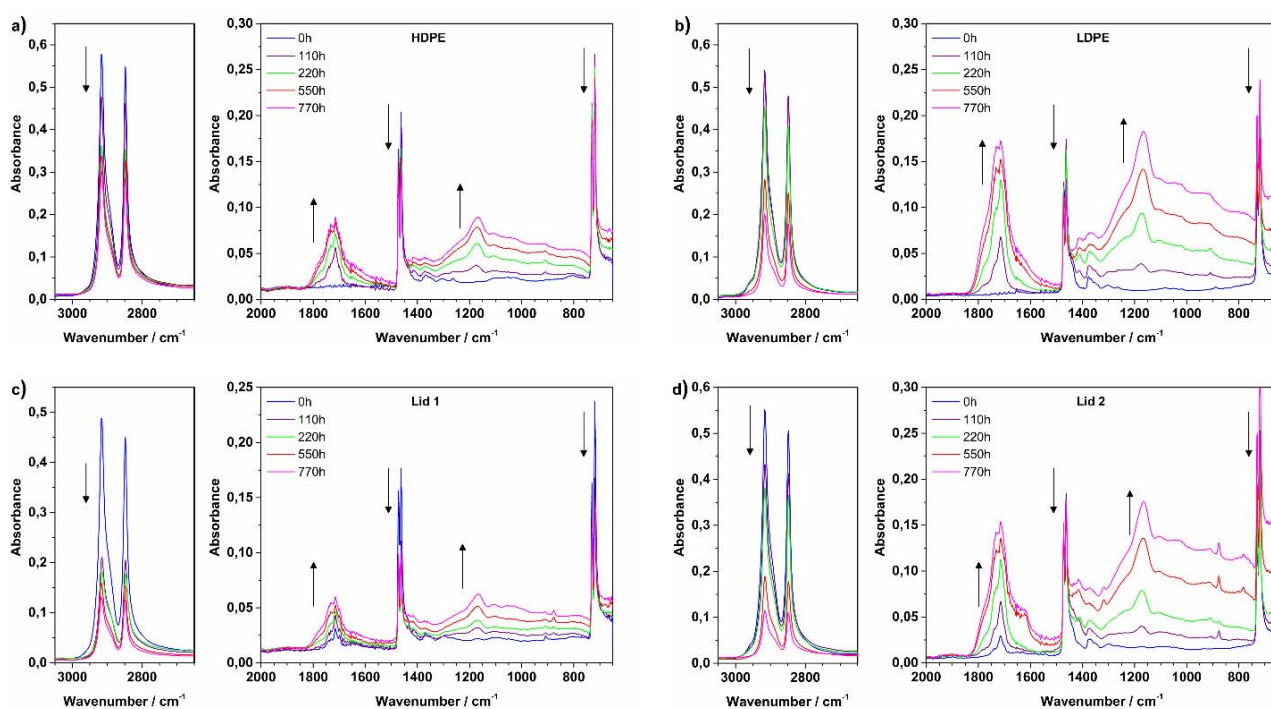

**Figure S9.** ATR-FTIR spectra of HDPE (a), LDPE (b), lid 1 (c) and lid 2 (d) samples over aging. The arrows' direction indicates the increase or decrease of IR bands intensity with increasing aging.

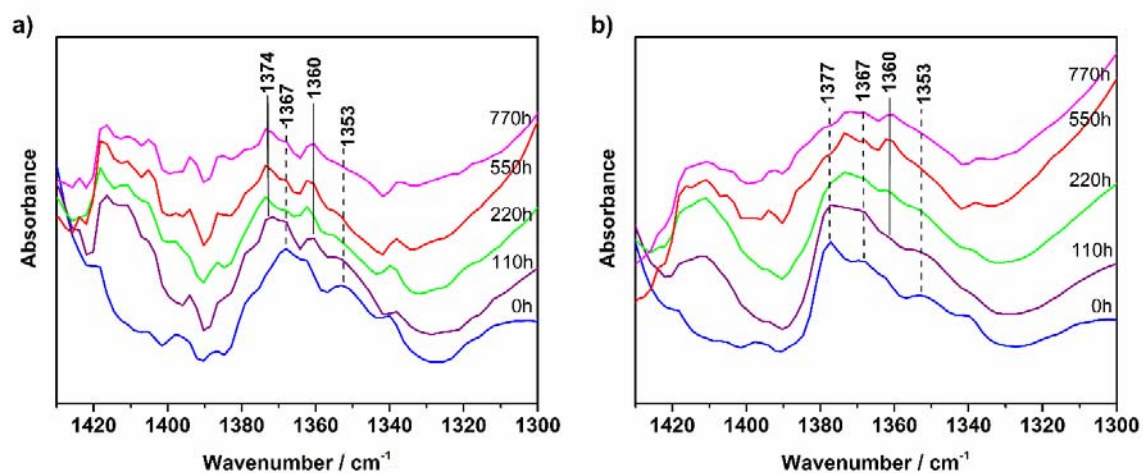

**Figure S10.** ATR-FTIR spectra of the (a) HDPE and (b) LDPE with magnification of the 1300–1430 cm<sup>-1</sup> range over aging.

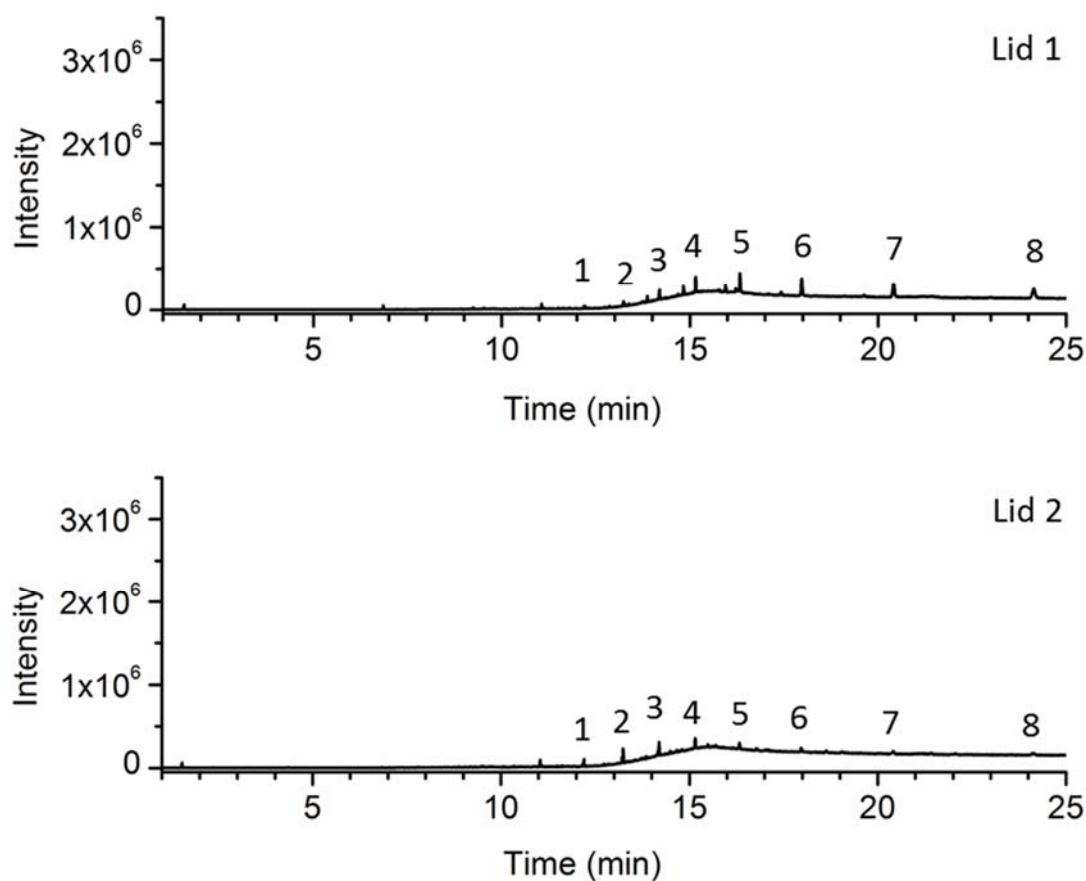

**Figure S11.** TD-chromatograms of lid 1 (up) and lid 2 (bottom). See **Table 2** for peak identification.



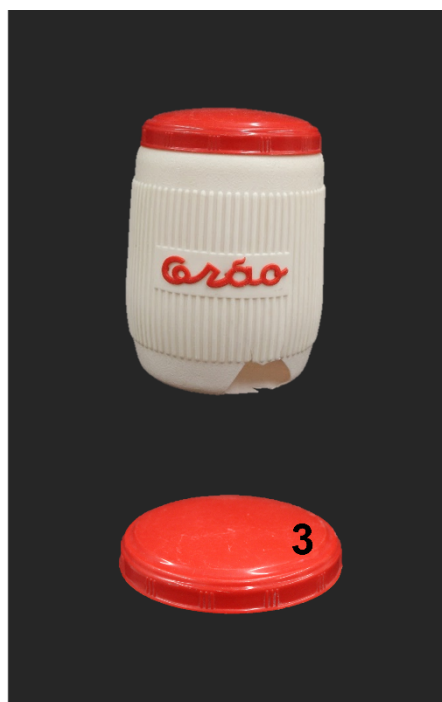

**Figure S12.** Historical sample presenting PR 53 not discolored. PS lid 3 on the bottom.

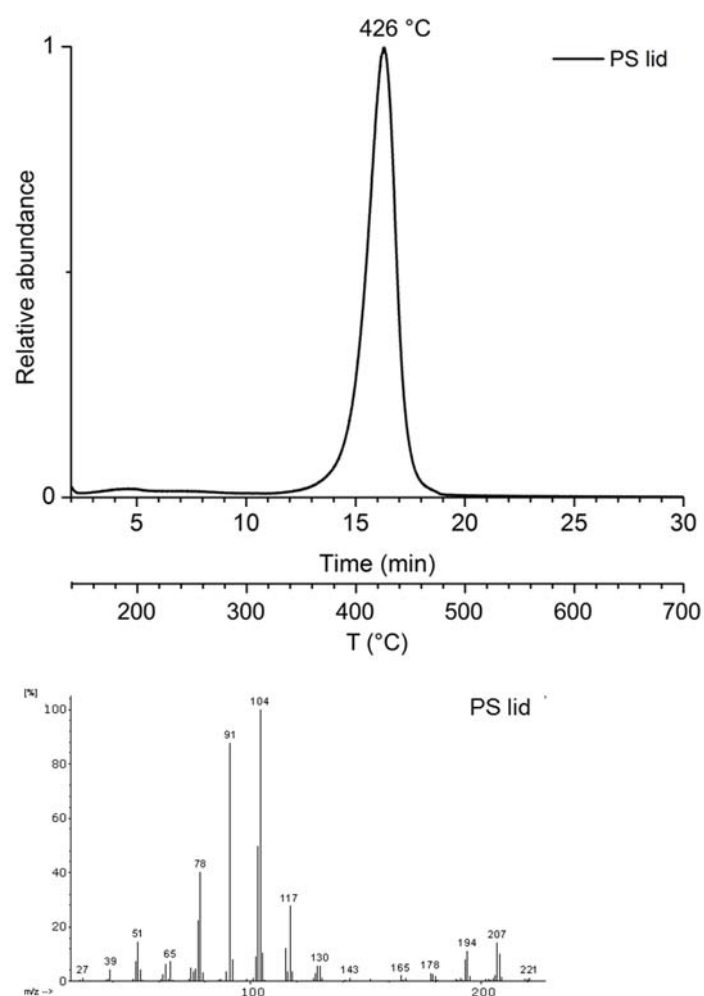

**Figure S13.** Top: normalized EGA-MS curves of the red PS lid 3 and bottom: related average mass spectrum.

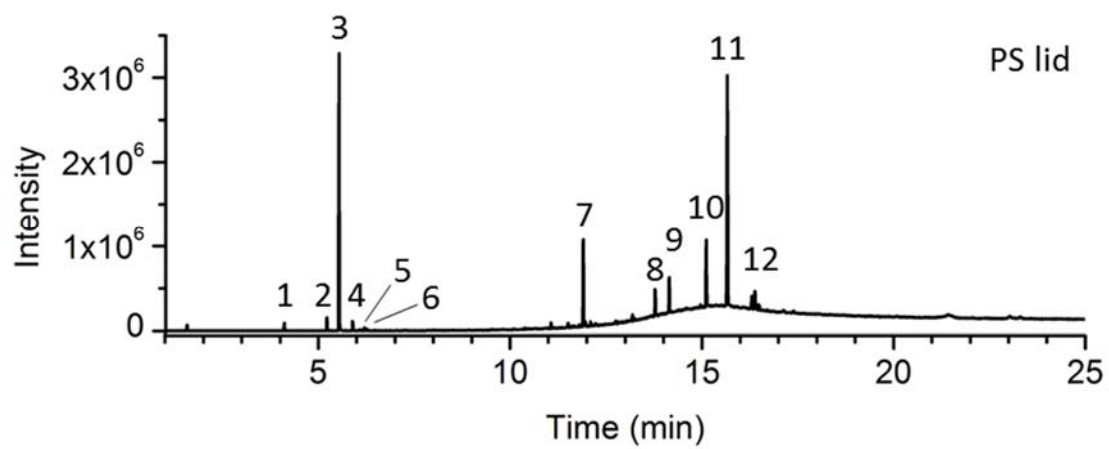

**Figure S14.** TD-chromatogram of the red PS lid 3. For the peaks identification, see **Table S5**.

## Tables

**Table S1.** Summary of multi-analytical analysis of polymer, red pigments and white pigments / fillers from [1].

| Historical sample | Plastic polymer | Elemental composition     | Red organic pigments | Red inorganic pigments | White pigments / fillers |
|-------------------|-----------------|---------------------------|----------------------|------------------------|--------------------------|
| Lid 1             | PE              | Ti, Ca, Zn, Fe, K, Cl, Si | PR 48:2              | PR 101                 | -                        |
| Lid 2             | PE              | Ti, Ca, Zn, Fe, Ba        | PR 53:1              | -                      | PW (R)                   |

Note. PR: Pigment Red, PW: Pigment White, R: rutile crystalline form

**Table S2.** Molecular structures and acronyms of the synthetic organic pigments studied.

| C.I. Generic name | Common name    | C.I. Constitution number | Class <sup>a</sup>             | Structure <sup>b</sup>                                                                |
|-------------------|----------------|--------------------------|--------------------------------|---------------------------------------------------------------------------------------|
| PR 48:2           | Calcium Red 2B | 15865:2                  | BONA pigment lake              | 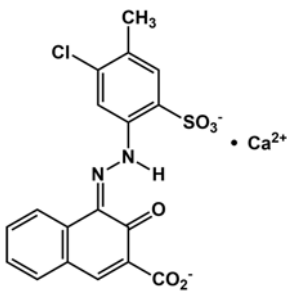 |
| PR 53:1           | Lake Red C     | 15585:1                  | $\beta$ -naphthol pigment lake |  |

Note. PR: Pigment Red, <sup>a</sup> Classification of organic pigments based on the chemical structure as presented in [2]. <sup>b</sup> Colorants based on 1-aryldiazene-2-naphthol skeleton, such as  $\beta$ -naphthol pigments, undergo a tautomeric rearrangement between hydrazone/keto and azo/enol forms. Molecular structures of the organic red pigment are depicted in the hydrazone/keto form which is accepted as the major tautomer [2].

**Table S3.** Colorimetric coordinates of HDPE, LDPE, lid 1 and lid 2 at each irradiation time. Total color difference  $\Delta E_{ab}^*$  (CIE1976),  $\Delta E_{00}$  (CIEDE2000) between 0h and 770h are reported.

|                        | HDPE  |       |              | LDPE  |       |              | Lid 1 |       |              | Lid 2 |       |              |
|------------------------|-------|-------|--------------|-------|-------|--------------|-------|-------|--------------|-------|-------|--------------|
|                        | L*    | a*    | b*           |
| 0h (t <sub>0</sub> )   | 88.17 | -0.41 | 2.04         | 86.14 | -0.01 | 3.92         | 41.55 | 55.61 | 40.56        | 46.02 | 45.99 | 23.65        |
| ±                      | 0.12  | 0.01  | 0.02         | 0.05  | 0.01  | 0.02         | 0.04  | 0.06  | 0.07         | 0.05  | 0.20  | 0.08         |
| 110h (t <sub>1</sub> ) | 88.57 | -0.44 | 1.28         | 85.96 | 0.03  | 3.53         | 42.37 | 47.87 | 26.59        | 61.87 | 22.12 | 12.04        |
| ±                      | 0.06  | 0.02  | 0.01         | 0.01  | 0.01  | 0.01         | 0.03  | 0.15  | 0.23         | 0.05  | 0.01  | 0.06         |
| 220h (t <sub>2</sub> ) | 89.42 | -0.51 | 1.67         | 86.60 | -0.06 | 3.40         | 45.08 | 45.54 | 23.89        | 68.67 | 11.51 | 12.92        |
| ±                      | 0.51  | 0.01  | 0.03         | 0.07  | 0.01  | 0.01         | 0.02  | 0.05  | 0.06         | 0.29  | 0.10  | 0.06         |
| 550h (t <sub>3</sub> ) | 90.43 | -0.85 | 7.65         | 87.69 | -1.14 | 11.20        | 58.45 | 30.51 | 13.74        | 74.59 | 5.97  | 19.97        |
| ±                      | 0.80  | 0.01  | 0.04         | 0.25  | 0.02  | 0.04         | 0.09  | 0.08  | 0.16         | 0.24  | 0.01  | 0.32         |
| 770h (t <sub>4</sub> ) | 90.45 | -0.81 | 12.54        | 85.44 | -0.41 | 20.07        | 64.62 | 25.87 | 14.74        | 73.47 | 6.81  | 25.67        |
| ±                      | 0.08  | 0.04  | 0.15         | 0.16  | 0.01  | 0.04         | 0.06  | 0.05  | 0.14         | 0.28  | 0.04  | 0.97         |
| $\Delta E_{ab}^*$      |       |       | <b>10.75</b> |       |       | <b>16.17</b> |       |       | <b>45.64</b> |       |       | <b>47.88</b> |
| $\Delta E_{00}$        |       |       | <b>8.04</b>  |       |       | <b>10.50</b> |       |       | <b>25.74</b> |       |       | <b>33.94</b> |

**Table S4.** List of pyrolysis products from the pigment powders PR 48:2 and PR 52:1 before (0h) and after aging (770h). Characteristic ions in mass spectra: molecular weight (M<sub>w</sub>) bold, base peak underlined.

| tr / min | Compound                      | m/z                                            | PR48 (0h) | PR48 (770h) | PR53 (0h) | PR53 (770h) |
|----------|-------------------------------|------------------------------------------------|-----------|-------------|-----------|-------------|
| 1.56     | CO <sub>2</sub>               | 28, <u><b>44</b></u>                           | x         | x           | x         | x           |
| 1.60     | Sulfur dioxide                | 32, 48, <u><b>64</b></u>                       | x         | x           | x         | x           |
| 2.73     | Benzene                       | 39, 51, <u><b>78</b></u>                       | x         | x           | x         | x           |
| 5.27     | Styrene                       | 51, 78, <u><b>104</b></u>                      | x         | x           | x         | x           |
| 5.99     | Toluene, o-chloro             | 39, 63, <u><b>91</b></u> , <b>126</b>          | x         | x           | x         | x           |
| 6.24     | Phenol                        | 39, 66, <u><b>94</b></u>                       |           | x           |           | x           |
| 6.25     | Aniline                       | 39, 66, <u><b>93</b></u>                       | x         |             | x         |             |
| 6.32     | Benzonitrile                  | 50, 76, <u><b>103</b></u>                      | x         | x           | x         | x           |
| 7.05     | Indene                        | 39, 63, 89, 115, <u><b>116</b></u>             | x         | x           | x         | x           |
| 7.26     | m-tolunitrile                 | 39, 63, 90, <u><b>117</b></u>                  | x         | x           |           |             |
| 7.27     | m-cresol                      | 51, 77, 90, <u><b>107</b></u> , <b>108</b>     |           |             | x         | x           |
| 7.30     | p-toluidine                   | 39, 53, 77, 89, <u><b>106</b></u> , <b>107</b> | x         | x           |           |             |
| 7.36     | m-toluidine                   | 39, 53, 77, 89, <u><b>106</b></u> , <b>107</b> |           |             | x         | x           |
| 8.46     | Quinoline                     | 51, 63, 76, 102, <u><b>129</b></u>             | x         | x           | x         | x           |
| 8.51     | Naphthalene                   | 51, 63, 102, <u><b>128</b></u>                 | x         | x           | x         | x           |
| 8.59     | m-Chloroaniline               | 39, 65, 92, <u><b>127</b></u>                  | x         | x           |           |             |
| 9.09     | 3-Chloro-4-methylbenzonitrile | 39, 63, 89, <u><b>116</b></u> , <b>151</b>     | x         | x           |           |             |
| 9.36     | Phenol, 3-chloro-4-methyl     | 39, 51, 77, <u><b>107</b></u> , <b>142</b>     | x         | x           |           |             |
| 9.38     | Phenol, 4-chloro-3-methyl     | 39, 51, 77, <u><b>107</b></u> , <b>142</b>     |           |             | x         | x           |
| 9.49     | p-Toluidine, 3-chloro-        | 51, 77, 106, <u><b>140</b></u> , <b>141</b>    | x         | x           |           |             |

|       |                                              |                                      |   |   |   |   |
|-------|----------------------------------------------|--------------------------------------|---|---|---|---|
| 9.56  | m-Toluidine, 4-chloro                        | 51, 77, <u>106</u> , 140, <b>141</b> |   |   | x | x |
| 9.67  | Phthalic anhydride                           | 50, 76, <u>104</u> , <b>148</b>      |   | x |   | x |
| 9.95  | 1H-Indene-1,3(2H)-dione                      | 50, 76, 104, <b>146</b>              |   | x |   |   |
| 10.52 | Similar to 4-Cyanocinnoline                  | 50, 74, 100, <u>127</u> , <b>155</b> | x | x |   |   |
| 10.90 | Phthalimide                                  | 50, 76, 104, <u>147</u>              |   | x |   | x |
| 11.29 | 2,4-di-tert-Butylphenol                      | 57, 163, <u>191</u> , <b>206</b>     | x |   |   |   |
| 11.47 | $\beta$ -Naphthol                            | 89, 115, <u>144</u>                  | x | x | x | x |
| 11.50 | Similar to 4-quinolinecarboxaldehyde         | 51, 75, 101, 129, <u>157</u>         | x | x |   |   |
| 11.69 | Unidentified                                 | 114, 140, <u>169</u>                 | x | x |   |   |
| 11.70 | Similar to 2-naphthalenamine                 | 71, 115, <u>143</u>                  |   |   | x | x |
| 12.48 | Unidentified                                 | 114, 154, <u>183</u>                 | x | x |   |   |
| 13.26 | 2-Naphthalenol, 1-amino                      | 51, 77, 103, 130, <u>159</u>         | x | x | x | x |
| 15.76 | Unidentified                                 | 189, 219, <u>234</u>                 |   |   | x | x |
| 16.16 | Unidentified                                 | 94, 189, <u>218</u>                  | x | x |   |   |
| 17.05 | Similar to 2H-phenanthro[9,10-b]pyran        | 101, 202, <u>232</u>                 |   |   | x | x |
| 17.13 | Unidentified                                 | 202, <u>232</u>                      | x | x |   |   |
| 17.19 | Unidentified                                 | 115, 205, <u>268</u>                 |   |   | x | x |
| 17.50 | Unidentified                                 | 189, 202, 218, 233, <u>268</u>       | x | x | x | x |
| 17.72 | Unidentified                                 | 94, 189, <u>252</u>                  | x | x | x | x |
| 17.83 | Unidentified                                 | 76, 104, 192, 227, 236, <u>271</u>   |   | x |   |   |
| 17.88 | Unidentified                                 | 114, <u>245</u>                      | x | x | x | x |
| 18.67 | Unidentified                                 | 122, <u>244</u> , 266                | x | x |   |   |
| 18.75 | 9-Chloro-5,6-dihydronaphthol[1,2-c]cinnoline | 101, 202, 231, <u>266</u>            |   |   | x | x |
| 18.77 | 8-Chloro-5,6-dihydronaphthol[1,2-c]cinnoline | 101, 202, 231, <u>266</u>            | x | x |   |   |
| 19.59 | Unidentified                                 | 115, 127, 241, <u>270</u>            |   |   | x | x |
| 20.22 | Unidentified                                 | 121, 243, <u>278</u>                 | x | x |   |   |
| 21.20 | Unidentified                                 | 119, 239, <u>268</u>                 |   |   | x | x |
| 21.85 | Unidentified                                 | 200, 231, <u>330</u>                 |   |   | x | x |

**Table S5.** Main volatile organic compounds detected in the red PS lid 3 (characteristic ions in mass spectra: molecular weight,  $M_w$ , in bold and base peak underlined). Additives are marked in *italic*.

| Peak number | Compound                | $m/z$                                            |
|-------------|-------------------------|--------------------------------------------------|
| 1           | Toluene                 | 39, 65, 89, <u>91</u> , <b>92</b>                |
| 2           | Ethylbenzene            | 39, 51, 65, 77, <u>91</u> , <b>106</b>           |
| 3           | Styrene                 | 39, 51, 63, 78, <u>104</u>                       |
| 4           | Isopropylbenzene        | 39, 51, 79, 91, <u>105</u> , <b>120</b>          |
| 5           | Allylbenzene            | 39, 51, 65, 78, 91, 103, <u>117</u> , <b>118</b> |
| 6           | $\alpha$ -Methylstyrene | 39, 51, 78, 91, 103, 117, <u>118</u>             |

|    |                                                 |                                                                 |
|----|-------------------------------------------------|-----------------------------------------------------------------|
| 7  | 3-Butene-1,3-diyl dibenzene (styrene dimer)     | 39, 51, 65, 77, <u>91</u> , 104, 115, 130, 193, <b>208</b>      |
| 8  | <i>Drometrizol</i>                              | 39, 51, 66, 78, 93, 154, 168, 196, <u>225</u>                   |
| 9  | <i>Palmitic acid butyl ester</i>                | 29, 43, <u>56</u> , 73, 97, 129, 185, 239, 257, <b>312</b>      |
| 10 | <i>Stearic acid butyl ester</i>                 | 29, 43, <u>56</u> , 73, 97, 129, 185, 241, 267, 285, <b>340</b> |
| 11 | 5-Hexene-1,3,5-triyltribenzene (styrene trimer) | 65, 77, <u>91</u> , 117, 194, 207, <b>312</b>                   |
| 12 | Isomers of styrene trimer                       | 65, 77, 91, <u>129</u> , 207, <b>312</b>                        |

---

## References

- [1] Angelin, E. M.; França de Sá, S.; Picollo, M.; Nevin, A.; Callapez, M. E.; Melo, M. J. The identification of synthetic organic red pigments in historical plastics: Developing an in situ analytical protocol based on Raman microscopy. *J Raman Spectrosc.* **2021**, 52, 145-158. DOI: [10.1002/jrs.5985](https://doi.org/10.1002/jrs.5985)
- [2] Hunger, K.; Schmidt M. U. *Industrial Organic Pigments: Production, Crystal Structures, Properties, Applications*, 4th ed.; Wiley-VCH: Weinheim, Germany, 2018.
